# Supplementary material for: Dynamic Changes of Ocular Surface in First-Time Contact Lens Wearers and the Effective Factors of Contact Lens Discomfort
Source: Front Med (Lausanne). 2022 Mar 11;9:833962. doi: 10.3389/fmed.2022.833962 (PMC8962650; doi:10.3389/fmed.2022.833962)
Supplement: Supplementary file 6 [file Table_5.xlsx]

## Sheet: Enrolled_26
N. O.	Age (year)	Gender	Spherical powers (D)	Cylinder powers (D)	TBUT (s)	Schirmer I (mm)	OSDI	Conjunctival redness	Limbal redness	Corneal neovascularization	Corneal staining	Conjunctival staining	Papillary conjunctivitis	Blepharitis	Meibomian gland dysfunction	Lens powers - spherical (D)	Cornea Front K1	Cornea Front K2	Corneal Cylinder
1	24	0	-2.5	-1	4.66667	15	9.09091	1.5	0.1	0	0.333333	0.1	0.2	0.4	0.8	-2.75	43.6667	45.1333	1.46667
2	24	1	-4	0	2.33333	6	11.3636	1.7	0.3	0.0666667	0.466667	0.1	0.3	0.6	0.6	-3.75	41.6	42.7333	1.13333
3	25	1	-5	-0.75	5.66667	20	0	1.5	0.3	0	0.166667	0.7	0.2	0.3	0.8	-5	44.0333	44.5667	0.533333
4	25	0	-6.5	-0.75	3.66667	6.5	12.5	1.3	0.2	0.3	0.4	0.6	0.1	0.4	0.6	-6.5	44.3667	46	1.63333
5	24	0	-4	-0.5	3	30	10	1.5	0	0.0333333	0	1	0.1	0.2	0.6	-4	42.5	42.9333	0.433333
6	24	0	-5	0	7.66667	24	22.7273	0.9	0.3	0	0.4	0.6	0.4	0.6	1.7	-4.75	44.9333	46.0333	1.1
7	23	0	-1.75	-0.75	1.33333	30	12.5	0.6	0.1	0.0666667	0	0.9	0.1	0	0.7	-1.75	44.6667	45.3667	0.7
8	25	0	-8.25	0	3.33333	4	10.4167	1.4	0.6	0.1	0.4	0.5	0.3	0.3	0.7	-7.5	43.7	44.1	0.4
9	25	0	-3	-1.25	7.66667	1	22.9167	1.5	0.3	0.0666667	0	0.4	0.4	0.3	0.4	-3.5	45	45.3667	0.366667
10	26	1	-1.25	-0.5	15.6667	30	0	2	0.5	0	1.86667	0.2	0.5	1	0.7	-1.5	43.1	44.8	1.7
11	22	0	-8.5	-1.5	2.33333	21	6.25	0.4	0	0.0333333	0	0.7	0.2	0	0.7	-8	41.7	43.5667	1.86667
12	23	0	-5.75	-0.75	5	16	10.4167	1	0.3	0	0	0.9	0.4	0.7	0.5	-5.25	42.5	43.1667	0.666667
13	22	0	-2	-0.5	6.66667	0	6.25	1.4	0.5	0.0666667	0.5	0.4	0.8	0.3	0.2	-2	42.3	43.1667	0.866667
14	23	0	-6.25	0	2	30	11.3636	1.3	0.1	0.0333333	1.23333	1.4	0.9	0.3	0.2	-5.75	44.1333	45.2	1.06667
15	23	0	-4.25	-1.5	7	6	2.08333	1.9	0.4	0.0666667	0.0666667	0.7	0.5	0.1	1.4	-4.75	43.6667	43.9333	0.266667
16	24	1	-5.75	-1.25	1	1	0	1.4	0	0	0	1.5	0.6	0.8	1	-5.5	42.2333	43.1	0.866667
17	23	1	-4	-1.5	9.66667	19	20.8333	1	0	0	0.433333	0.7	0.7	0.4	1.2	-4.5	43.4333	45.7333	2.3
18	22	0	-7.5	0	3.66667	17.2	6.25	0.9	0	0.0666667	0	1	0.6	0.5	0.4	-6.75	41.9333	42.9	0.966667
19	28	1	-2	0	2.66667	1	8.33333	2	0.8	0.2	0.3	1.2	0.5	1.1	0.9	-2	41.3667	42.0333	0.666667
20	23	1	-5	-0.25	3.33333	25	4.54545	1.3	0.8	0.133333	0	0.4	0.2	1	0.7	-4.5	41.3667	41.7333	0.366667
21	24	0	-4.75	-1.5	6.66667	28	5	0.8	0	0.1	0	1	0.933333	0.466667	0.6	-4.75	43.7	45.2333	1.53333
22	22	1	-5	-0.5	1.33333	11.1	6.81818	2	1.23333	0	0.0666667	1	0.666667	0.666667	0.8	-5	42.6667	44.1333	1.46667
23	24	0	-3.25	-0.25	2	2	12.5	1.8	1.6	0.333333	1.83333	0.366667	0.633333	0.5	0.7	-3	42.9	43.6333	0.733333
24	24	0	-8.5	-1	3.66667	30	6.25	1.26667	0.266667	0	1.23333	1.06667	0.4	0.666667	1.43333	-7.5	43.7333	45.4	1.66667
25	23	1	-4.5	-0.5	6.66667	30	31.25	1.6	0.233333	0.0111111	0	1.4	0.2	0.533333	0.633333	-3.5	43.8	44.2	0.4
26	21	0	-0.25	-1	3	30	2.08333	1.4	0.133333	0	1.13333	1.16667	0.166667	0.2	0.366667	-1	42.9667	43.0667	0.1

## Sheet: Baseline to 6m
N. O.	Conjunctival redness_pre	Conjunctival redness_post 1w	Conjunctival redness_post 1m	Conjunctival redness_post 3m	Conjunctival redness_post 6m	Limbal redness_pre	Limbal redness_post 1w	Limbal redness_post 1m	Limbal redness post_3m	Limbal redness post_6m	Corneal neovascularization_pre	Corneal neovascularization_post 1w	Corneal neovascularization_post 1m	Corneal neovascularization_post 3m	Corneal neovascularization_post 6m	Corneal staining_pre	Corneal staining_post 1w	Corneal staining_post 1m	Corneal staining_post 3m	Corneal staining_post 6m	Conjunctival staining_pre	Conjunctival staining_post 1w	Conjunctival staining_post 1m	Conjunctival staining_post 3m	Conjunctival staining_post 6m	Papillary conjunctivitis_pre	Papillary conjunctivitis_post 1w	Papillary conjunctivitis_post 1m	Papillary conjunctivitis_post 3m	Papillary conjunctivitis_post 6m	Blepharitis_pre	Blepharitis_post 1w	Blepharitis_post 1m	Blepharitis_post 3m	Blepharitis_post 6m	Meibomian gland dysfunction_pre	Meibomian gland dysfunction_post 1w	Meibomian gland dysfunction_post 1m	Meibomian gland dysfunction_post 3m	Meibomian gland dysfunction_post 6m	TBUT (s) pre	TBUT (s) post 1w	TBUT (s) post 1m	TBUT (s) post 3m	TBUT (s) post 6m	Schirmer I (mm) pre	Schirmer I (mm) post 1w	Schirmer I (mm) post 1m	Schirmer I (mm) post 3m
1	1.5	1.4	1.5	1.6	1.5	0.1	0.4	0.3	0.4	0.5	0	0	0	0.0333333	0.0333333	0.333333	1.66667	2.26667	1.83333	1.06667	0.1	1.3	1.6	1.2	0.7	0.2	0.4	0.3	0.7	0.8	0.4	0.4	0.5	0.5	0.5	0.8	1.1	1.1	1.2	1	4.66667	2	2.33333	2.33333	2.66667	15	7.9	8	7
2	1.7	1.1	1.6	1.3	1.4	0.3	0.5	0.9	0.5	0.8	0.0666667	0.0666667	0.1	0.0666667	0.0666667	0.466667	2.56667	1.56667	1.63333	0.666667	0.1	1.4	1.5	1.2	1.1	0.3	0.7	0.7	0.7	0.7	0.6	0.6	0.6	0.5	0.6	0.6	1.3	1.2	1	1.7	2.33333	6	3.33333	7.66667	4.33333	6	2.5	6.3	6.1
3	1.5	1.9	1.7	2	2.3	0.3	0.6	0.6	1.1	2.2	0	0	0	0	0	0.166667	0.433333	2.46667	0.4	0.666667	0.7	0.7	1	1.4	1.1	0.2	0.6	0.7	0.5	0.7	0.3	0.8	0.8	0.6	0.8	0.8	1.3	0.9	1.2	1.3	5.66667	1	4.33333	2.66667	3.33333	20	13	24.6	14
4	1.3	1	1.1			0.2	0.7	1.1			0.3	0.4	0.7			0.4	1.9	1.2			0.6	1.2	1.2			0.1	0.6	0.4			0.4	0.4	0.6			0.6	1.2	1.1			3.66667	9	6.33333			6.5	3.9	16
5	1.5	1.8	2.2	1.9	2.1	0	0.7	0.6	1.5	1.8	0.0333333	0.0333333	0.0333333	0.0333333	0.0333333	0	3.16667	2.6	2.16667	2.86667	1	1.9	1.7	1.3	1.2	0.1	0.3	0.5	0.3	0.8	0.2	0.6	0.4	0.3	0.8	0.6	0.9	0.9	0.4	1	3	6	6.66667	3	3.33333	30	11.6	21	35
6	0.9	1.3	1.1			0.3	0.4	0.5			0	0.1	0.1			0.4	1.6	1.9			0.6	0.9	0.9			0.4	0.4	0.2			0.6	0.7	0.6			1.7	1.6	1.4			7.66667	4.33333	2.33333			24	18	30.2
7	0.6	1.1	1.5	1.3	1.3	0.1	0.6	0.6	0.8	0.7	0.0666667	0.0666667	0.0666667	0.0666667	0.1	0	0.5	2.36667	1.83333	0	0.9	1	1.2	1.2	1.5	0.1	0.2	0.2	0.1	0.7	0	0.6	0.5	0.6	0.8	0.7	1	1	0.8	0.6	1.33333	2.33333	1.66667	2	3.33333	30	30	30	35
8	1.4	1.7	1.7			0.6	1.1	0.8			0.1	0.2	0.2			0.4	2.8	3.4			0.5	1	1.3			0.3	1.1	1.3			0.3	0.5	0.4			0.7	0.9	1			3.33333	2.66667	2.66667			4	6	5.7
9	1.5	1.3	1	0.7	1.7	0.3	0.6	0.6	0	0.7	0.0666667	0.0666667	0.0666667	0.0666667	0.133333	0	2	2.9	2.46667	2.66667	0.4	1.1	1.6	1.2	1.3	0.4	0.6	0.5	0.5	0.8	0.3	0.4	0.5	0.4	0.8	0.4	0.8	1.1	0.6	1.2	7.66667	5.66667	5	7.33333	7.33333	1	1	7	3
10	2	1.5	2	1.3	2	0.5	1.2	1	1	0.4	0	0	0.0666667	0.0666667	0	1.86667	1.53333	1.6	1.8	1.06667	0.2	0.7	1	1.7	0.7	0.5	0.9	0.7	0.4	0.7	1	0.7	0.6	0.6	0.8	0.7	1.3	1.3	0.8	1.6	15.6667	10	3.33333	1.33333	3	30	24	18.7	35
11	0.4	1.4	1.4	1.3	2.2	0	1.5	0.6	0.7	1	0.0333333	0.1	0.1	0.133333	0.1	0	2.56667	0.5	0	0	0.7	1.1	1.7	1.1	1.1	0.2	0.4	0.5	0.6	0.3	0	0.7	0.5	0.3	0.3	0.7	1.1	0.2	0.5	1.2	2.33333	3	2.33333	2	1.33333	21	18	7	18
12	1	1.2	1.5	1	0.6	0.3	0.9	0.8	1.1	0.2	0	0	0	0.0666667	0	0	0.1	1.63333	1.86667	0.833333	0.9	1.1	1	0.8	1	0.4	0.6	1.2	1	1.4	0.7	0.6	0.7	0.3	1.1	0.5	0.9	1	0.5	0.9	5	2.66667	2.66667	2	3.66667	16	5	8	5
13	1.4	1.5	1.9	1.6	1.6	0.5	0.9	1.1	1.4	0.8	0.0666667	0.133333	0.133333	0.2	0.1	0.5	1.33333	1.56667	1.93333	0.166667	0.4	1.4	1.2	1	1	0.8	0.9	0.7	1.1	1.5	0.3	0.5	0.6	0.7	0.7	0.2	1	1.1	0.8	1.4	6.66667	3	2.33333	3	2	0	3.5	1	3
14	1.3	1.3	1.9	1.9	0.9	0.1	0.6	1.6	1	0.5	0.0333333	0.0333333	0.0333333	0.0333333	0.0333333	1.23333	2.13333	1.73333	2.43333	2.96667	1.4	1.3	1.3	1.3	1.7	0.9	1.2	1	1.1	1.4	0.3	0.2	0.2	0.4	0.4	0.2	0.1	0.2	0.6	0.4	2	2	3	2.66667	2.33333	30	6	4	5.1
15	1.9	1.7	2.5	2.2	1.7	0.4	1	1.5	1.2	0.9	0.0666667	0.0666667	0.0666667	0.0666667	0.0666667	0.0666667	2.7	1.76667	1.2	2.86667	0.7	1.1	1.1	0.9	0.9	0.5	0.6	0.7	1	0.7	0.1	0.4	0.7	0.6	0.3	1.4	1.3	1.1	1.4	1.4	7	4	2.66667	2.33333	2.66667	6	6	5.2	3
16	1.4	2.3	1.7	1	1.4	0	0.8	0.7	0.3	0.4	0	0.0666667	0.0666667	0	0	0	1.23333	1.46667	0	1.36667	1.5	2.8	1.4	1.1	1.1	0.6	1.1	0.9	1	1.1	0.8	0.6	0.6	0.6	0.5	1	0.5	1.1	0.4	0.5	1	1.33333	2	4	1.66667	1	9.3	2	4
17	1	0.4	1.6	0.4	0.7	0	0	0.4	0	0.3	0	0	0	0	0	0.433333	0.933333	1.5	0	1.2	0.7	1.3	1.2	0.9	0	0.7	1.2	0.8	1.3	1.1	0.4	0.6	0.6	0.6	0.9	1.2	1.1	0.6	1.3	1.5	9.66667	3.66667	2.33333	7.66667	4.33333	19	30	16.2	7
18	0.9	1.4	2.1	1.4	2.1	0	0.3	1.2	0.4	1.5	0.0666667	0.0666667	0.1	0.1	0.133333	0	1.3	1.93333	2.53333	1	1	1.5	0.9	1.1	0	0.6	0.9	0.7	1.5	0.8	0.5	0.5	0.3	0.6	0.2	0.4	0.6	0.4	0.8	1.1	3.66667	2	4.33333	2	3.33333	17.2	15	15.5	7.8
19	2	2	2.6	2.3	2.3	0.8	1	1.5	1.4	1.1	0.2	0.3	0.3	0.2	0.3	0.3	0.8	1.1	2	1	1.2	1.6	1	0.8	0.7	0.5	0.6	0.6	0.5	0.6	1.1	0.8	0.6	0.6	1	0.9	1	0.6	1.2	0.9	2.66667	4.33333	1.33333	7.66667	1	1	9	11.2	12
20	1.3	1.5	1.9	1.6	1.6	0.8	0.9	1.4	1.5	1.3	0.133333	0.1	0.133333	0.2	0.133333	0	2	2.1	2.36667	2	0.4	1.3	1	1.1	0.5	0.2	0.4	0.5	0.5	0.3	1	0.6	0.6	0.7	0.8	0.7	1	0.8	1.2	1	3.33333	2	3	2	4.66667	25	27.9	30	18
21	0.8	0.866667	0.6	1.23333	0.7	0	0.233333	0.0666667	0.266667	0.933333	0.1	0.1	0.111111	0.133333	0.233333	0	0	2.16667	2.63333	3	1	1.23333	1.33333	1	0.933333	0.933333	1.06667	0.7	1.1	1.5	0.466667	0.466667	0.466667	0.3	0.6	0.6	1.23333	0.733333	0.833333	1.5	6.66667	9.33333	4	4.33333	6.66667	28	30	11	15.2
22	2	2.5	1.76667	2.73333	2.43333	1.23333	1.26667	1	1	1.2	0	0	0.0666667	0.0666667	0.0666667	0.0666667	1.06667	1.06667	0.366667	0.366667	1	1.6	1.46667	1	1.03333	0.666667	0.333333	0.233333	0.7	0.766667	0.666667	0.8	0.8	0.266667	0.533333	0.8	0.933333	1.06667	1.1	1.03333	1.33333	4	4.66667	5.33333	5.33333	11.1	8	18	14.5
23	1.8	1.53333	1.76667			1.6	0.966667	1.03333			0.333333	0.533333	0.433333			1.83333	1.9	1.73333			0.366667	0.5	1.16667			0.633333	0.8	0.933333			0.5	0.2	0.3			0.7	1.43333	0.433333			2	1.66667	2			2	1	1
24	1.26667	0.866667	1.1			0.266667	0.233333	0.5			0	0.0666667	0.5			1.23333	0	0.833333			1.06667	0.266667	1.53333			0.4	0.233333	0.233333			0.666667	0.166667	0.733333			1.43333	1.2	1.3			3.66667	1	1			30	20	30
25	1.6	1.4	1.7	1.5	1	0.233333	1.06667	0.933333	0.666667	0.6	0.0111111	0	0.0666667	0.0666667	0.133333	0	2.16667	1.86667	1.33333	1.26667	1.4	1.46667	0.566667	1.03333	0.566667	0.2	0.266667	0.466667	0.5	0.8	0.533333	0.3	0.3	0.433333	0.566667	0.633333	1.56667	1.66667	1.93333	1.16667	6.66667	4	5.33333	3	3	30	17.5	30	19
26	1.4	1.33333	1.33333	1.4	2.1	0.133333	0.466667	0.666667	0.5	0.6	0	0.0666667	0.0666667	0.0666667	0.0666667	1.13333	1.86667	1.26667	1.26667	1.16667	1.16667	0	0	1.03333	0.8	0.166667	0.133333	0.333333	0.333333	0.366667	0.2	0.233333	0.2	0.833333	0.366667	0.366667	0.633333	0.333333	0.533333	0.4	3	3.66667	3	4	3	30	13	10.8	15.5
[truncated: 46 more columns]

## Sheet: Baseline， 6m， stop
N. O.	Conjunctival redness_pre	Conjunctival redness_post 6m	Conjunctival redness_post NCL	Limbal redness_pre	Limbal redness post_6m	Limbal redness post_NCL	Corneal neovascularization_pre	Corneal neovascularization_post 6m	Corneal neovascularization_post NCL	Corneal staining_pre	Corneal staining_post 6m	Corneal staining_post NCL	Conjunctival staining_pre	Conjunctival staining_post 6m	Conjunctival staining_post NCL	Papillary conjunctivitis_pre	Papillary conjunctivitis_post 6m	Papillary conjunctivitis_post NCL	Blepharitis_pre	Blepharitis_post 6m	Blepharitis_post NCL	Meibomian gland dysfunction_pre	Meibomian gland dysfunction_post 6m	Meibomian gland dysfunction_post NCL	TBUT (s) pre	TBUT (s) post 6m	TBUT (s) post NCL	Schirmer I (mm) pre	Schirmer I (mm) post 6m	Schirmer I (mm) post NCL	Va (mm/s) pre	Va (mm/s) post 6m	Va (mm/s) post NCL	Dbox (microvascular network density) pre	Dbox (microvascular network density) post 6m	Dbox (microvascular network density) post NCL	Center Total Dendritic Cell Density (per mm2) pre	Center Total Dendritic Cell Density (per mm2) post 6m	Center Total Dendritic Cell Density (per mm2) post NCL	Center Dendritic Cell Area (μm2) pre	Center Dendritic Cell Area (μm2) post 6m	Center Dendritic Cell Area (μm2) post NCL	Center Number of Dendrites pre	Center Number of Dendrites post 6m	Center Number of Dendrites post NCL	Periphery Total Dendritic Cell Density (per mm2) pre	Periphery Total Dendritic Cell Density (per mm2) post 6m	Periphery Total Dendritic Cell Density (per mm2) post NCL	Periphery Dendritic Cell Area (μm2) pre
1	1.5	1.5	1.6	0.1	0.5	0	0	0.0333333	0	0.333333	1.06667	1.16667	0.1	0.7	0.8	0.2	0.8	0.9	0.4	0.5	0.3	0.8	1	1.1	4.66667	2.66667	4	15	7.5	11	0.704711	0.681495	0.596012	1.64766	1.54456	1.56889	10.4167	47.9167	120.833	33.7556	57.6667	63.8889	2	2.53333	2.73889	8.33333	60.4167	83.3333	73.338
2	1.7	1.4	1.1	0.3	0.8	0.2	0.0666667	0.0666667	0.0666667	0.466667	0.666667	0.666667	0.1	1.1	0.3	0.3	0.7	0.4	0.6	0.6	0.2	0.6	1.7	1.4	2.33333	4.33333	3.66667	6	17	8.1	0.391307	0.506608	0.357996	1.61991	1.60862	1.54991	27.0833	18.75	22.9167	53.5368	52	56.1667	2.3	2.25	2.47917	18.75	52.0833	29.1667	70.6997
5	1.5	2.1	2	0	1.8	0.7	0.0333333	0.0333333	0.0333333	0	2.86667	0	1	1.2	0.5	0.1	0.8	0.4	0.2	0.8	0.3	0.6	1	0.6	3	3.33333	14	30	35	28.6	0.604505	0.618649	0.561965	1.70596	1.64655	1.66731	6.25	18.75	10.4167	72.4	61.1667	60	2.1	2.5	2.2	6.25	54.1667	14.5833	74.104
7	0.6	1.3	1	0.1	0.7	0.3	0.0666667	0.1	0.0666667	0	0	0	0.9	1.5	0.3	0.1	0.7	0.1	0	0.8	0.1	0.7	0.6	1.2	1.33333	3.33333	3.33333	30	35	30	0.523841	0.622291	0.514839	1.76101	1.70194	1.77767	10.4167	147.917	183.333	36.4	57.375	57.8889	2.2	2.525	2.47222	14.5833	60.4167	47.9167	39.2
11	0.4	2.2	1.6	0	1	0.4	0.0333333	0.1	0.1	0	0	0.133333	0.7	1.1	0	0.2	0.3	0.3	0	0.3	0.2	0.7	1.2	1.1	2.33333	1.33333	1	21	11	26.5	0.386632	0.621403	0.545654	1.577	1.58167	1.55502	54.1667	27.0833	83.3333	48.4	62.7778	61	2.4	2.61111	2.41111	45.8333	29.1667	75	61
12	1	0.6	1.5	0.3	0.2	0.5	0	0	0	0	0.833333	1	0.9	1	0.1	0.4	1.4	0.3	0.7	1.1	0.4	0.5	0.9	0.9	5	3.66667	7	16	19	22	0.593362	0.699391	0.818704	1.71604	1.67472	1.64492	16.6667	50	50	52.2222	64	67.6	2	2.36667	2.7	14.5833	50	77.0833	69.5556
13	1.4	1.6	1.4	0.5	0.8	0.6	0.0666667	0.1	0.1	0.5	0.166667	1.06667	0.4	1	0.3	0.8	1.5	0.3	0.3	0.7	0.2	0.2	1.4	1.2	6.66667	2	2	0	2	3.5	0.479031	0.482354	0.471244	1.6405	1.5649	1.58593	27.0833	116.667	60.4167	48.4	60.4	61.5	2	2.5	2.4375	33.3333	83.3333	50	74.8
14	1.3	0.9	1.3	0.1	0.5	0.2	0.0333333	0.0333333	0.0333333	1.23333	2.96667	0.166667	1.4	1.7	0.1	0.9	1.4	0.8	0.3	0.4	0.2	0.2	0.4	0.2	2	2.33333	3	30	18.5	11	0.554224	0.636943	0.549991	1.61531	1.59801	1.57651	29.1667	58.3333	64.5833	34	57.6667	50.8571	2.5	2.82222	2.32143	14.5833	25	39.58	38.2
15	1.9	1.7	2.2	0.4	0.9	0.5	0.0666667	0.0666667	0	0.0666667	2.86667	0.366667	0.7	0.9	0.3	0.5	0.7	0.5	0.1	0.3	0.1	1.4	1.4	1.3	7	2.66667	5.33333	6	1	8.5	0.420487	0.688423	0.934465	1.69497	1.65214	1.68819	4.16667	14.5833	25	21.8	82.1667	90	2	2.91667	4.0492	10.4167	16.6667	12.5	46.8
16	1.4	1.4	1.1	0	0.4	0	0	0	0	0	1.36667	0	1.5	1.1	0.5	0.6	1.1	0.4	0.8	0.5	0.2	1	0.5	0.6	1	1.66667	3.33333	1	6.5	5.5	0.238184	0.345107	0.511413	1.66669	1.62005	1.6407	16.6667	164.583	54.1667	41.2	55.7778	65.2857	2.2	2.62778	2.25397	33.3333	68.75	35.4167	55.6
17	1	0.7	1	0	0.3	0.1	0	0	0	0.433333	1.2	0	0.7	0	0.2	0.7	1.1	0.7	0.4	0.9	0.3	1.2	1.5	1	9.66667	4.33333	5.66667	19	20	4.1	0.451413	0.455981	0.436856	1.70872	1.68099	1.61064	10.4167	8.33333	27.0833	34.6	66.6667	60.75	2.2	2.25	2.325	10.4167	33.3333	166.667	57.3
18	0.9	2.1	1.3	0	1.5	0.1	0.0666667	0.133333	0.0666667	0	1	0	1	0	0.2	0.6	0.8	1	0.5	0.2	0.3	0.4	1.1	0.3	3.66667	3.33333	4.66667	17.2	26	13	0.428457	0.553199	0.555346	1.59137	1.56574	1.6468	20.8333	31.25	62.5	34.1	72.6667	85.625	2.2	2.56667	2.7375	8.33333	60.4167	54.1667	55.2
20	1.3	1.6	1.8	0.8	1.3	0.8	0.133333	0.133333	0.1	0	2	0.133333	0.4	0.5	0.4	0.2	0.3	0.5	1	0.8	0.3	0.7	1	0.8	3.33333	4.66667	6.66667	25	25	22.5	0.384724	0.407194	0.551216	1.58655	1.50526	1.58414	14.5833	60.4167	52.0833	48.9	58.3	58.875	2.1	2.4	2.40972	33.3333	75	58.3333	68.3
[truncated: 8 more columns]

## Sheet: GEE_Baseline to 6m
no	time	age	gender	Sph	Cyl	CLP	OSDI	conjunred	limred	corneovas	corstain	conjunstain	papi	ble	mgd	TBUT	Schirmer	va	Dbox	DCCDen	DCCArea	DCCNumb	DCPDen	DCPArea	DCPNumb
1	2	24	0	-2.5	-1	-2.75	18.75	1.4	0.4	0	1.66667	1.3	0.4	0.4	1.1	2	7.9	0.733464	1.63558	14.5833	93	2.2	54.1667	101.444	2.5
2	2	24	1	-4	0	-3.75	16.6667	1.1	0.5	0.0666667	2.56667	1.4	0.7	0.6	1.3	6	2.5	0.414442	1.74032	12.5	59.3477	2.4	22.9167	67.2637	2.7
3	2	25	1	-5	-0.75	-5	10.4167	1.9	0.6	0	0.433333	0.7	0.6	0.8	1.3	1	13	0.377946	1.57096	6.25	52.6758	2.5	18.75	57.8636	2.3
4	2	25	0	-6.5	-0.75	-6.5	38.8889	1	0.7	0.4	1.9	1.2	0.6	0.4	1.2	9	3.9	0.481385	1.69408	89.5833	78.1	2	93.75	87.1	3.2
5	2	24	0	-4	-0.5	-4	22.5	1.8	0.7	0.0333333	3.16667	1.9	0.3	0.6	0.9	6	11.6	0.602695	1.60452	20.8333	72.8	2.7	72.9167	135.9	2.6
6	2	24	0	-5	0	-4.75	18.1818	1.3	0.4	0.1	1.6	0.9	0.4	0.7	1.6	4.33333	18	0.647431	1.58469	18.75	45.9183	2.4	54.1667	79.1338	3.5
7	2	23	0	-1.75	-0.75	-1.75	43.1818	1.1	0.6	0.0666667	0.5	1	0.2	0.6	1	2.33333	30	0.74565	1.79548	56.25	53.1	2.5	25	84.25	2.8
8	2	25	0	-8.25	0	-7.5	31.8182	1.7	1.1	0.2	2.8	1	1.1	0.5	0.9	2.66667	6	0.755761	1.64884	31.25	53.1029	2	127.083	50.5577	2.6
9	2	25	0	-3	-1.25	-3.5	22.9167	1.3	0.6	0.0666667	2	1.1	0.6	0.4	0.8	5.66667	1	0.703518	1.81726	16.6667	82.2	2.4	77.0833	107.3	3.2
10	2	26	1	-1.25	-0.5	-1.5	31.25	1.5	1.2	0	1.53333	0.7	0.9	0.7	1.3	10	24	0.275068	1.74428	22.9167	83.8	2.4	91.6667	96.2	2.6
11	2	22	0	-8.5	-1.5	-8	6.25	1.4	1.5	0.1	2.56667	1.1	0.4	0.7	1.1	3	18	0.518197	1.54409	41.6667	73.1	2.8	41.6667	74.7	2.9
12	2	23	0	-5.75	-0.75	-5.25	41.6667	1.2	0.9	0	0.1	1.1	0.6	0.6	0.9	2.66667	5	0.607013	1.63305	10.4167	64.6	2.5	29.1667	72.1	2.4
13	2	22	0	-2	-0.5	-2	41.6667	1.5	0.9	0.133333	1.33333	1.4	0.9	0.5	1	3	3.5	0.576255	1.62697	79.1667	48	2.5	93.75	90	2.8
14	2	23	0	-6.25	0	-5.75	12.5	1.3	0.6	0.0333333	2.13333	1.3	1.2	0.2	0.1	2	6	0.448629	1.63967	52.0833	34	2.4	56.25	58.5	2.7
15	2	23	0	-4.25	-1.5	-4.75	27.0833	1.7	1	0.0666667	2.7	1.1	0.6	0.4	1.3	4	6	0.708528	1.65794	4.16667	31.3333	2	27.0833	77.3	2.8
16	2	24	1	-5.75	-1.25	-5.5	25	2.3	0.8	0.0666667	1.23333	2.8	1.1	0.6	0.5	1.33333	9.3	0.442889	1.69733	22.9167	62.3	2.3	72.9167	131.4	2.7
17	2	23	1	-4	-1.5	-4.5	20.8333	0.4	0	0	0.933333	1.3	1.2	0.6	1.1	3.66667	30	0.400224	1.82259	8.33333	37.9	2.4	31.25	60.7	2.6
18	2	22	0	-7.5	0	-6.75	12.5	1.4	0.3	0.0666667	1.3	1.5	0.9	0.5	0.6	2	15	0.438557	1.61925	29.1667	37.2	2.9	39.5833	84	2.7
19	2	28	1	-2	0	-2	27.2727	2	1	0.3	0.8	1.6	0.6	0.8	1	4.33333	9	0.404934	1.65806		37	3.1	191.667	102	2.7
20	2	23	1	-5	-0.25	-4.5	15.9091	1.5	0.9	0.1	2	1.3	0.4	0.6	1	2	27.9	0.367142	1.59055	83.3333	70.6	2.7	106.25	123.2	3.1
21	2	24	0	-4.75	-1.5	-4.75	22.5	0.866667	0.233333	0.1	0	1.23333	1.06667	0.466667	1.23333	9.33333	30	0.466156	1.65653	6.25	74.6667	2.83333	10.4167	71.25	2.29167
22	2	22	1	-5	-0.5	-5	12.5	2.5	1.26667	0	1.06667	1.6	0.333333	0.8	0.933333	4	8	0.456469	1.68639	50	60.5	2.38889	45.8333	55.25	2.17361
23	2	24	0	-3.25	-0.25	-3	34.0909	1.53333	0.966667	0.533333	1.9	0.5	0.8	0.2	1.43333	1.66667	1	0.62725	1.62888	45.8333	69.2222	2.45556	22.9167	99.6667	3.31667
24	2	24	0	-8.5	-1	-7.5	18.75	0.866667	0.233333	0.0666667	0	0.266667	0.233333	0.166667	1.2	1	20	0.67144	1.82912	6.25	63.3333	2.33333	8.33333	47	2.375
25	2	23	1	-4.5	-0.5	-3.5	32.5	1.4	1.06667	0	2.16667	1.46667	0.266667	0.3	1.56667	4	17.5	0.516167	1.64284	27.0833	74.3333	2.27778	81.25	97.2857	2.48571
26	2	21	0	-0.25	-1	-1	25	1.33333	0.466667	0.0666667	1.86667	0	0.133333	0.233333	0.633333	3.66667	13	0.571996	1.63828	52.0833	57	2.36111	39.5833	64.7778	2.31111
1	3	24	0	-2.5	-1	-2.75	11.3636	1.5	0.3	0	2.26667	1.6	0.3	0.5	1.1	2.33333	8	0.617565	1.61864	16.6667	60	2.7	75	98	2.5
2	3	24	1	-4	0	-3.75	8.33333	1.6	0.9	0.1	1.56667	1.5	0.7	0.6	1.2	3.33333	6.3	0.581365	1.63784	35.4167	94.1	2.8	127.083	126	3.3
3	3	25	1	-5	-0.75	-5	36.3636	1.7	0.6	0	2.46667	1	0.7	0.8	0.9	4.33333	24.6	0.576125	1.57735	16.6667	56	2.3	70.8333	143.9	2.8
4	3	25	0	-6.5	-0.75	-6.5	32.5	1.1	1.1	0.7	1.2	1.2	0.4	0.6	1.1	6.33333	16	0.397829	1.70467	118.75	71.2	2.2	160.417	138.4	3
5	3	24	0	-4	-0.5	-4	34.0909	2.2	0.6	0.0333333	2.6	1.7	0.5	0.4	0.9	6.66667	21	0.790183	1.68376	20.8333	62.8889	2.6	97.9167	123.1	3.5
6	3	24	0	-5	0	-4.75	22.7273	1.1	0.5	0.1	1.9	0.9	0.2	0.6	1.4	2.33333	30.2	0.746347	1.65168	45.8333	57.2	2.6	54.1667	134.9	3.2
7	3	23	0	-1.75	-0.75	-1.75	47.7273	1.5	0.6	0.0666667	2.36667	1.2	0.2	0.5	1	1.66667	30	0.800651	1.69769	181.25	43.9	2.4	87.5	113.7	3.8
8	3	25	0	-8.25	0	-7.5	40.9091	1.7	0.8	0.2	3.4	1.3	1.3	0.4	1	2.66667	5.7	0.707646	1.71753	120.833	82.3	2.7	160.417	96.7	3.7
9	3	25	0	-3	-1.25	-3.5	36.3636	1	0.6	0.0666667	2.9	1.6	0.5	0.5	1.1	5	7	0.826551	1.67745	25	75.9	2.7	106.25	111	3.2
10	3	26	1	-1.25	-0.5	-1.5	20.8333	2	1	0.0666667	1.6	1	0.7	0.6	1.3	3.33333	18.7	0.281953	1.73849	97.9167	89.1111	2.6	100	103.8	2.9
11	3	22	0	-8.5	-1.5	-8	6.25	1.4	0.6	0.1	0.5	1.7	0.5	0.5	0.2	2.33333	7	0.477974	1.66339	145.833	66.8	3.3	68.75	69.6	3.2
12	3	23	0	-5.75	-0.75	-5.25	43.75	1.5	0.8	0	1.63333	1	1.2	0.7	1	2.66667	8	0.557486	1.6246	29.1667	83.4	2.9	83.3333	102.7	3.3
13	3	22	0	-2	-0.5	-2	29.5455	1.9	1.1	0.133333	1.56667	1.2	0.7	0.6	1.1	2.33333	1	0.481579	1.63698	95.8333	82.8	2.2	162.5	93	2.8
14	3	23	0	-6.25	0	-5.75	12.5	1.9	1.6	0.0333333	1.73333	1.3	1	0.2	0.2	3	4	0.629138	1.70511	35.4167	49.4	2.1	43.75	70.9	2.4
15	3	23	0	-4.25	-1.5	-4.75	27.0833	2.5	1.5	0.0666667	1.76667	1.1	0.7	0.7	1.1	2.66667	5.2	0.67016	1.69988	8.33333	49.2	2.4	35.4167	119	3.3
16	3	24	1	-5.75	-1.25	-5.5	20.4545	1.7	0.7	0.0666667	1.46667	1.4	0.9	0.6	1.1	2	2	0.515323	1.60713	50	55.7	2.4	62.5	117.889	3.6
17	3	23	1	-4	-1.5	-4.5	10.4167	1.6	0.4	0	1.5	1.2	0.8	0.6	0.6	2.33333	16.2	0.45345	1.6035	25	56.2	2.6	104.167	84.5	3
18	3	22	0	-7.5	0	-6.75	10	2.1	1.2	0.1	1.93333	0.9	0.7	0.3	0.4	4.33333	15.5	0.365901	1.62363	25	49.4	2.4	56.25	117.8	3
19	3	28	1	-2	0	-2	45.4545	2.6	1.5	0.3	1.1	1	0.6	0.6	0.6	1.33333	11.2	0.480509	1.62893		79	2.77778	193.75	130	2.8
20	3	23	1	-5	-0.25	-4.5	8.33333	1.9	1.4	0.133333	2.1	1	0.5	0.6	0.8	3	30	0.387499	1.53321	100	70.4	2.8	150	123.3	3.2
21	3	24	0	-4.75	-1.5	-4.75	25	0.6	0.0666667	0.111111	2.16667	1.33333	0.7	0.466667	0.733333	4	11	0.544554	1.76824	12.5	68.6	2.7	12.5	82.25	2.85
22	3	22	1	-5	-0.5	-5	13.8889	1.76667	1	0.0666667	1.06667	1.46667	0.233333	0.8	1.06667	4.66667	18	0.508442	1.66835	41.6667	55.4286	2.44286	52.0833	67.2857	2.34286
23	3	24	0	-3.25	-0.25	-3	27.2727	1.76667	1.03333	0.433333	1.73333	1.16667	0.933333	0.3	0.433333	2	1	0.682621	1.6003	52.0833	77	2.46429	41.6667	59.2857	2.54286
24	3	24	0	-8.5	-1	-7.5	20.4545	1.1	0.5	0.5	0.833333	1.53333	0.233333	0.733333	1.3	1	30	0.924245	1.68094	16.6667	66	2.5	12.5	61.25	2.1
25	3	23	1	-4.5	-0.5	-3.5	30	1.7	0.933333	0.0666667	1.86667	0.566667	0.466667	0.3	1.66667	5.33333	30	0.51352	1.63858	25	72.6	2.53333	43.75	81.8	2.75
26	3	21	0	-0.25	-1	-1	27.7778	1.33333	0.666667	0.0666667	1.26667	0	0.333333	0.2	0.333333	3	10.8	0.695319	1.71287	81.25	54.1111	2.35556	39.5833	58.75	2.3875
1	4	24	0	-2.5	-1	-2.75	20	1.6	0.4	0.0333333	1.83333	1.2	0.7	0.5	1.2	2.33333	7	0.625978	1.67476	43.75	70.5	2.85	33.3333	90.7	3.25
2	4	24	1	-4	0	-3.75	3.125	1.3	0.5	0.0666667	1.63333	1.2	0.7	0.5	1	7.66667	6.1	0.425527	1.73936	25	94.1	3.07778	62.5	104.7	2.85
3	4	25	1	-5	-0.75	-5	12.5	2	1.1	0	0.4	1.4	0.5	0.6	1.2	2.66667	14	0.477568	1.57742	18.75	65.25	2.55	25	129.5	3.3
4	4	25	0	-6.5	-0.75	-6.5
5	4	24	0	-4	-0.5	-4	34.0909	1.9	1.5	0.0333333	2.16667	1.3	0.3	0.3	0.4	3	35	0.713721	1.71731	45.8333	82.3333	3.16111	70.8333	78.1	2.8
6	4	24	0	-5	0	-4.75
7	4	23	0	-1.75	-0.75	-1.75	62.5	1.3	0.8	0.0666667	1.83333	1.2	0.1	0.6	0.8	2	35	0.703378	1.6032	85.4167	54.7	2.1	77.0833	106.9	2.95
8	4	25	0	-8.25	0	-7.5
9	4	25	0	-3	-1.25	-3.5	20.4545	0.7	0	0.0666667	2.46667	1.2	0.5	0.4	0.6	7.33333	3	0.542374	1.72547	56.25	64.9	2.55	58.3333	104.7	3.01111
10	4	26	1	-1.25	-0.5	-1.5	20.8333	1.3	1	0.0666667	1.8	1.7	0.4	0.6	0.8	1.33333	35	0.393811	1.77277	62.5	78.3	2.65	102.083	143.1	2.55
11	4	22	0	-8.5	-1.5	-8	10.4167	1.3	0.7	0.133333	0	1.1	0.6	0.3	0.5	2	18	0.41927	1.60794	41.6667	64.5556	2.26111	47.9167	73	2.36667
12	4	23	0	-5.75	-0.75	-5.25	29.1667	1	1.1	0.0666667	1.86667	0.8	1	0.3	0.5	2	5	0.597997	1.68552	66.6667	60	2.42222	116.667	72	2.9
13	4	22	0	-2	-0.5	-2	47.5	1.6	1.4	0.2	1.93333	1	1.1	0.7	0.8	3	3	0.562656	1.61531	168.75	46	2.6	62.5	54.7	2.31111
14	4	23	0	-6.25	0	-5.75	13.8889	1.9	1	0.0333333	2.43333	1.3	1.1	0.4	0.6	2.66667	5.1	0.532895	1.58363	39.5833	56.25	2.5	45.8333	80.5	2.76667
15	4	23	0	-4.25	-1.5	-4.75	25	2.2	1.2	0.0666667	1.2	0.9	1	0.6	1.4	2.33333	3	0.850819	1.65881	2.08333	63	2.5	14.5833	75	2.53889
16	4	24	1	-5.75	-1.25	-5.5	8.33333	1	0.3	0	0	1.1	1	0.6	0.4	4	4	0.418753	1.68951	43.75	47.7	2.55	50	67.5	2.4
17	4	23	1	-4	-1.5	-4.5	16.6667	0.4	0	0	0	0.9	1.3	0.6	1.3	7.66667	7	0.298337	1.79358	20.8333	79.6	2.25	66.6667	86.3	2.75
18	4	22	0	-7.5	0	-6.75	11.3636	1.4	0.4	0.1	2.53333	1.1	1.5	0.6	0.8	2	7.8	0.369532	1.62817	25	72.2	2.4	72.9167	77.8	2.15
19	4	28	1	-2	0	-2	50	2.3	1.4	0.2	2	0.8	0.5	0.6	1.2	7.66667	12	0.464611	1.66648		62.2	2.5	137.5	77.9	2.5
20	4	23	1	-5	-0.25	-4.5	15.9091	1.6	1.5	0.2	2.36667	1.1	0.5	0.7	1.2	2	18	0.453719	1.53436	108.333	84.2	2.35	108.333	79.8	2.8
21	4	24	0	-4.75	-1.5	-4.75	31.8182	1.23333	0.266667	0.133333	2.63333	1	1.1	0.3	0.833333	4.33333	15.2	0.755683	1.61261	18.75	61.5714	2.5	37.5	109	2.83889
22	4	22	1	-5	-0.5	-5	18.75	2.73333	1	0.0666667	0.366667	1	0.7	0.266667	1.1	5.33333	14.5	0.540089	1.64922	58.3333	112.125	2.9875	52.0833	97.5	2.825
23	4	24	0	-3.25	-0.25	-3
24	4	24	0	-8.5	-1	-7.5
25	4	23	1	-4.5	-0.5	-3.5	29.5455	1.5	0.666667	0.0666667	1.33333	1.03333	0.5	0.433333	1.93333	3	19	0.61704	1.6024	29.1667	49.875	2.18056	47.9167	65	2.31667
26	4	21	0	-0.25	-1	-1	22.5	1.4	0.5	0.0666667	1.26667	1.03333	0.333333	0.833333	0.533333	4	15.5	0.707323	1.71507	93.75	61	2.37222	79.1667	75.1111	2.95
1	5	24	0	-2.5	-1	-2.75	18.1818	1.5	0.5	0.0333333	1.06667	0.7	0.8	0.5	1	2.66667	7.5	0.681495	1.54456	47.9167	57.6667	2.53333	60.4167	56	2.35
2	5	24	1	-4	0	-3.75	7.5	1.4	0.8	0.0666667	0.666667	1.1	0.7	0.6	1.7	4.33333	17	0.506608	1.60862	18.75	52	2.25	52.0833	65.11	2.48333
3	5	25	1	-5	-0.75	-5	25	2.3	2.2	0	0.666667	1.1	0.7	0.8	1.3	3.33333	12	0.557153	1.61835	27.0833	46.1429	2.35714	22.9167	53.4	2.85
4	5	25	0	-6.5	-0.75	-6.5
5	5	24	0	-4	-0.5	-4	32.5	2.1	1.8	0.0333333	2.86667	1.2	0.8	0.8	1	3.33333	35	0.618649	1.64655	18.75	61.1667	2.5	54.1667	63.3	2.85
6	5	24	0	-5	0	-4.75
7	5	23	0	-1.75	-0.75	-1.75	58.3333	1.3	0.7	0.1	0	1.5	0.7	0.8	0.6	3.33333	35	0.622291	1.70194	147.917	57.375	2.525	60.4167	42.375	2.2875
8	5	25	0	-8.25	0	-7.5
9	5	25	0	-3	-1.25	-3.5	40.9091	1.7	0.7	0.133333	2.66667	1.3	0.8	0.8	1.2	7.33333	3.5	0.647196	1.71829	14.5833	71.4	3	20.8333	53.4286	2.35714
10	5	26	1	-1.25	-0.5	-1.5	22.9167	2	0.4	0	1.06667	0.7	0.7	0.8	1.6	3	33	0.338067	1.61369	52.0833	48.2	2.55	47.9167	54.4	2.25
11	5	22	0	-8.5	-1.5	-8	10.4167	2.2	1	0.1	0	1.1	0.3	0.3	1.2	1.33333	11	0.621403	1.58167	27.0833	62.7778	2.61111	29.1667	58.5556	2.22222
12	5	23	0	-5.75	-0.75	-5.25	31.25	0.6	0.2	0	0.833333	1	1.4	1.1	0.9	3.66667	19	0.699391	1.67472	50	64	2.36667	50	93.7	2.8
13	5	22	0	-2	-0.5	-2	27.5	1.6	0.8	0.1	0.166667	1	1.5	0.7	1.4	2	2	0.482354	1.5649	116.667	60.4	2.5	83.3333	44.3333	2.35
14	5	23	0	-6.25	0	-5.75	25	0.9	0.5	0.0333333	2.96667	1.7	1.4	0.4	0.4	2.33333	18.5	0.636943	1.59801	58.3333	57.6667	2.82222	25	41.8	2.28571
15	5	23	0	-4.25	-1.5	-4.75	29.1667	1.7	0.9	0.0666667	2.86667	0.9	0.7	0.3	1.4	2.66667	1	0.688423	1.65214	14.5833	82.1667	2.91667	16.6667	128.2	2.63333
16	5	24	1	-5.75	-1.25	-5.5	15.9091	1.4	0.4	0	1.36667	1.1	1.1	0.5	0.5	1.66667	6.5	0.345107	1.62005	164.583	55.7778	2.62778	68.75	58.3	2.15
17	5	23	1	-4	-1.5	-4.5	31.25	0.7	0.3	0	1.2	0	1.1	0.9	1.5	4.33333	20	0.455981	1.68099	8.33333	66.6667	2.25	33.3333	77	2.84444
18	5	22	0	-7.5	0	-6.75	6.81818	2.1	1.5	0.133333	1	0	0.8	0.2	1.1	3.33333	26	0.553199	1.56574	31.25	72.6667	2.56667	60.4167	68.5	2.22917
19	5	28	1	-2	0	-2	22.7273	2.3	1.1	0.3	1	0.7	0.6	1	0.9	1	22.5	0.472373	1.67633		63.5556	2.74444	254.167	79.7	2.65
20	5	23	1	-5	-0.25	-4.5	15.9091	1.6	1.3	0.133333	2	0.5	0.3	0.8	1	4.66667	25	0.407194	1.50526	60.4167	58.3	2.4	75	66.9	3
21	5	24	0	-4.75	-1.5	-4.75	34.0909	0.7	0.933333	0.233333	3	0.933333	1.5	0.6	1.5	6.66667	11	0.518194	1.62033	37.5	69.7143	2.51429	39.5833	75.4286	2.83571
22	5	22	1	-5	-0.5	-5	12.5	2.43333	1.2	0.0666667	0.366667	1.03333	0.766667	0.533333	1.03333	5.33333	14.5	0.423671	1.70723	91.6667	64.3333	2.83889	64.5833	97.5714	2.54286
23	5	24	0	-3.25	-0.25	-3
24	5	24	0	-8.5	-1	-7.5
25	5	23	1	-4.5	-0.5	-3.5	27.2727	1	0.6	0.133333	1.26667	0.566667	0.8	0.566667	1.16667	3	30	0.563461	1.6695	79.1667	70.2222	2.93333	54.1667	80.2222	2.25
26	5	21	0	-0.25	-1	-1	17.5	2.1	0.6	0.0666667	1.16667	0.8	0.366667	0.366667	0.4	3	27.2	0.644205	1.62735	100	69.3333	2.41667	68.75	65.7778	2.46667
